# Supplementary material for: A synthesis of women’s participation in small-scale fisheries management: why women’s voices matter
Source: PubMed Central journal article supplement (PMC10838824; doi:10.1007/s11160-023-09806-2), 2023-10-18
Supplement: 11160_2023_9806_MOESM1_ESM.pdf [file 11160_2023_9806_MOESM1_ESM.pdf]

# SUPPLEMENTARY FILE 1

## **Article title: A Synthesis of Women's Participation in Small-Scale Fisheries Management: Why Women's Voices Matter**

**Journal name:** *Reviews in Fish Biology and Fisheries*

**Authors and Affiliations:** Mouna CHAMBON<sup>1</sup>, Sara MIÑARRO<sup>1</sup>, Santiago ALVAREZ FERNANDEZ<sup>1</sup>, Vincent PORCHER<sup>1,2</sup>, Victoria REYES-GARCIA<sup>1,3,4</sup>, Huran TONALLI DROUET<sup>5</sup>, Patrizia ZIVERI<sup>1,3,6</sup>

<sup>1</sup> Institute of Environmental Science and Technology, Universitat Autònoma de Barcelona, (ICTA-UAB), 08193, Bellaterra, Barcelona, Spain.

<sup>2</sup> Unité mixte de recherche "Savoirs Environnement Sociétés"(SENS), Institut de recherche pour le développement (IRD) & Centre de coopération internationale en recherche agronomique pour le développement (Cirad), Montpellier, France.

<sup>3</sup> Institució Catalana de Recerca i Estudis Avançats (ICREA), Barcelona 08010, Spain.

<sup>4</sup> Dept. d'Antropologia Social i Cultural, Universitat Autònoma de Barcelona, 08193, Bellaterra, Barcelona, Spain.

<sup>5</sup> Université libre de Bruxelles, Avenue Franklin Roosevelt 50, 1050, Bruxelles, Belgium.

<sup>6</sup> Dept. de Biologia Animal, Biologia Vegetal i Ecologia, Universitat Autònoma de Barcelona, 08193, Bellaterra, Barcelona, Spain.

**Corresponding author:**

Mouna CHAMBON

Institute of Environmental Science and Technology, Universitat Autònoma de Barcelona (ICTA-UAB), 08193, Bellaterra, Barcelona, Spain

ORCID: 0000-0002-2260-5145; Tel : (+34) 6.67.58.05.87; E-mail : [Mouna.Chambon@uab.cat](mailto:Mouna.Chambon@uab.cat)

**Online Resource 1- Tab. S1** List of publications included in the systematic review

| ID N° | Reference                                                                                                                                                                                                                                                                                                                  |
|-------|----------------------------------------------------------------------------------------------------------------------------------------------------------------------------------------------------------------------------------------------------------------------------------------------------------------------------|
| 1     | Short, R.E., Mussa, J., Hill, N.A.O., Rowcliffe, M., & Milner-Gulland, E.J. (2020). Challenging assumptions: the gendered nature of mosquito net fishing and the implications for management. <i>Gender, Technology and Development</i> , 24, 66–88. DOI: 10.1080/09718524.2020.1729583                                    |
| 2     | Silva, A.B., Barros, R.F., Souto, W.M., Soares, R.R., Alencar, N.L., & Lopes, C.G. (2019). “Which Fishes Do I Catch?” Predicting the Artisanal Fishers’ Local Knowledge About Target-Species in Brazil. <i>Human Ecology</i> , 47, 865-876. DOI: 10.1007/s10745-019-00117-4                                                |
| 3     | Barclay, K.M., Fabinyi, M., Kinch, J.P., & Foale, S.J. (2019). Governability of High-Value Fisheries in Low-Income Contexts: a Case Study of the Sea Cucumber Fishery in Papua New Guinea. <i>Human Ecology</i> . DOI: 10.1007/s10745-019-00078-8                                                                          |
| 4     | Solano, N., Lopez-Ercilla, I., Fernandez-Rivera Melo, F.J., & Torre, J. (2021) Unveiling Women’s Roles and Inclusion in Mexican Small-Scale Fisheries (SSF). <i>Frontiers in Marine Science</i> , 7, 617965. DOI: 10.3389/fmars.2020.617965                                                                                |
| 5     | Mangubhai, S., & Lawless, S. (2021). Exploring gender inclusion in small-scale fisheries management and development in Melanesia. <i>Marine Policy</i> , 123, 104287. DOI: 10.1016/j.marpol.2020.104287                                                                                                                    |
| 6     | Grantham, R., Lau, J. & Kleiber, D. (2020). Gleaning: beyond the subsistence narrative. <i>Maritime Studies</i> , 19, 509–524. DOI: 10.1007/s40152-020-00200-3                                                                                                                                                             |
| 7     | Freitas, C.T., Espírito-Santo, H.M., Campos-Silva, J.V., Peres, C.A., & Lopes, P.F. (2020). Resource co-management as a step towards gender equity in fisheries. <i>Ecological Economics</i> , 176, 106709. DOI: 10.1016/j.ecolecon.2020.106709                                                                            |
| 8     | Herrera-Racionero, P., Lizcano, E., Miret-Pastor, L., & Mascarell, Y. (2020). ‘The Sea is Our Life’. Woman in the Fishery Sector of the Valencian Community. <i>Sociologia Ruralis</i> . DOI: 10.1111/soru.12318                                                                                                           |
| 9     | Alati, V.M., Olunga, J., Olendo, M., Daudi, L.N., Osuka, K., Odoli, C., Tuda, P., & Nordlund, L.M. (2020). Mollusc shell fisheries in coastal Kenya: Local ecological knowledge reveals overfishing. <i>Ocean &amp; Coastal Management</i> , 195, 105285. DOI:10.1016/j.ocecoaman.2020.105285                              |
| 10    | Purcell, S.W., Tagliafico, A., Cullis, B.R. & Gogel, B.J. (2020) Understanding Gender and Factors Affecting Fishing in an Artisanal Shellfish Fishery. <i>Frontiers in Marine Science</i> , 7, 297. DOI: 10.3389/fmars.2020.00297                                                                                          |
| 11    | Tilley, A., Burgos, A., Duarte, A. <i>et al.</i> (2021). Contribution of women’s fisheries substantial, but overlooked, in Timor-Leste. <i>Ambio</i> , 50, 113–124. DOI: 10.1007/s13280-020-01335-7                                                                                                                        |
| 12    | Cele, N. (2020) Are you a fisher or mussel collector?: Examining gendered identity markers in the small-scale fishing industry. <i>Agenda</i> , 34, 1, 141-150. DOI: 10.1080/10130950.2020.1721195                                                                                                                         |
| 13    | da Silva Mourão, J., Baracho, R.L., Martel, G. <i>et al.</i> (2020). Local ecological knowledge of shellfish collectors in an extractivist reserve, Northeast Brazil: implications for co-management. <i>Hydrobiologia</i> , 847, 1977–1997. DOI: 10.1007/s10750-020-04226-w                                               |
| 14    | Delaney, A.E., Schreiber, M.A. & Alfaro-Shigueto, J. (2019). Innovative and traditional actions. <i>Maritime Studies</i> , 18, 287–295. DOI: 10.1007/s40152-019-00150-5                                                                                                                                                    |
| 15    | Samoilys, M.A., Osuka, K.E., Mussa, J., Rosendo, S., Riddell, M., Diade, M., Mbugua, J., Kawaka, J.A., Hill, N., & Koldewey, H.J. (2019). An integrated assessment of coastal fisheries in Mozambique for conservation planning. <i>Ocean &amp; Coastal Management</i> , 182, 104924. DOI: 10.1016/j.ocecoaman.2019.104924 |
| 16    | Manyungwa, C.L., Hara, M.M. & Chimatiro, S.K. (2019). Women’s engagement in and outcomes from small-scale fisheries value chains in Malawi: effects of social relations. <i>Maritime Studies</i> , 18, 275–285. DOI: 10.1007/s40152-019-00156-z                                                                            |
| 17    | Singleton, R.L., Allison, E.H., Gough, C., Kamat, V.R., leBillon, P., Robson, L.C., & Sumaila, U.R. (2019). Conservation, contraception and controversy: Supporting human rights to enable sustainable fisheries in Madagascar. <i>Global Environmental Change</i> . DOI: doi.org/10.1016/j.gloenvcha.2019.101946          |
| 18    | Siegelman, B., Haenn, N.H., & Basurto, X. (2019). “Lies build trust”: Social capital, masculinity, and community-based resource management in a Mexican fishery. <i>World Development</i> , 123, 104601, ISSN 0305-750X. DOI: 10.1016/j.worlddev.2019.05.031                                                               |
| 19    | Kwok, Y.E., KC, K.B., Silver, J.J. and Fraser, E. (2020), Perceptions of gender dynamics in small-scale fisheries and conservation areas in the Pursat province of Tonle Sap Lake, Cambodia. <i>Asia-Pacific View</i> , 61, 54-70. DOI : 10.1111/apv.12225                                                                 |
| 20    | Furkon, Nessa, N., Ambo-Rappe, R. <i>et al.</i> (2020). Social-ecological drivers and dynamics of seagrass gleaning fisheries. <i>Ambio</i> , 49, 1271–1281. DOI: 10.1007/s13280-019-01267-x                                                                                                                               |
| 21    | Rabbitt, S., Lilley, I., Albert, S., & Tibbetts, I.R. (2019). What’s the catch in who fishes? Fisherwomen’s contributions to fisheries and food security in Marovo Lagoon, Solomon Islands. <i>Marine Policy</i> , 108, 103667. DOI:10.1016/j.marpol.2019.103667                                                           |
| 22    | Wosu, A. (2019). Access and institutions in a small-scale octopus fishery: A gendered perspective. <i>Marine Policy</i> , 108, 103649. DOI : 10.1016/j.marpol.2019.103649                                                                                                                                                  |

|    |                                                                                                                                                                                                                                                                                                                                                                                                                                                                                                                           |
|----|---------------------------------------------------------------------------------------------------------------------------------------------------------------------------------------------------------------------------------------------------------------------------------------------------------------------------------------------------------------------------------------------------------------------------------------------------------------------------------------------------------------------------|
| 23 | Millar, J., Robinson, W.A., Baumgartner, L.J., Homsombath, K., Chittavong, M., Phommavong, T., & Singhanouvong, D. (2018). Local perceptions of changes in the use and management of floodplain fisheries commons: the case of Pak Peung wetland in Lao PDR. <i>Environment, Development and Sustainability</i> , 1-18, 1835–1852. DOI: 10.1007/s10668-018-0105-3                                                                                                                                                         |
| 24 | Lavoie, A., Lee, J., Sparks, K., Hoseth, G., & Wise, S. (2019). Engaging with Women's Knowledge in Bristol Bay Fisheries through Oral History and Participatory Ethnography. <i>Fisheries</i> , 44, 331-337. DOI: 10.1002/fsh.10271                                                                                                                                                                                                                                                                                       |
| 25 | Gianelli, I., Ortega, L., Defeo, O. (2019). Modeling short-term fishing dynamics in a small-scale intertidal shellfishery. <i>Fisheries Research</i> , 209, 242–250. DOI: 10.1016/j.fishres.2018.09.028                                                                                                                                                                                                                                                                                                                   |
| 26 | Khan, F.N., Collins, A.M., Nayak, P.K. <i>et al.</i> (2018). Women's perspectives of small-scale fisheries and environmental change in Chilika lagoon, India. <i>Maritime Studies</i> , 17, 145–154. DOI: 10.1007/s40152-018-0100-1                                                                                                                                                                                                                                                                                       |
| 27 | Rohe, J., Schlüter, A., & Ferse, S.C.A. (2018). A gender lens on women's harvesting activities and interactions with local marine governance in a South Pacific fishing community. <i>Maritime Studies</i> , 17, 155–162. DOI: 10.1007/s40152-018-0106-8                                                                                                                                                                                                                                                                  |
| 28 | Kleiber, D., Harris, L., & Vincent, A.C.J. (2018). Gender and marine protected areas: a case study of Danajon Bank, Philippines. <i>Maritime Studies</i> , 17, 163–175. DOI: 10.1007/s40152-018-0107-7                                                                                                                                                                                                                                                                                                                    |
| 29 | Gallardo-Fernández, G.L., & Saunders, F. (2018). “Before we asked for permission, now we only give notice”: Women's entrance into artisanal fisheries in Chile. <i>Maritime Studies</i> , 17, 177–188. DOI: 10.1007/s40152-018-0110-z                                                                                                                                                                                                                                                                                     |
| 30 | Purcell, S.W., Lalavanua, W., Cullis, B.R., & Cocks, N.A. (2018). Small-scale fishing income and fuel consumption: Fiji's artisanal sea cucumber fishery. <i>ICES Journal of Marine Science</i> , 75, 1758–1767. DOI: 10.1093/icesjms/fsy036                                                                                                                                                                                                                                                                              |
| 31 | Quiros, T.E., Beck, M.W., Araw, A., Croll, D.A., & Tershy, B.R. (2018). Small-scale seagrass fisheries can reduce social vulnerability: a comparative case study. <i>Ocean &amp; Coastal Management</i> , 157, 56-67. DOI :10.1016/j.ocecoaman.2018.02.003                                                                                                                                                                                                                                                                |
| 32 | Uc-Espadas, M., Molina-Rosales, D., Gurri, F.D., Pérez-Jiménez, J.C., & Vázquez-García, V. (2018). Fishing activities by gender and reproductive stage in Isla Arena, Campeche, Mexico. <i>Marine Policy</i> , 89, 34–39. DOI: 10.1016/j.marpol.2017.12.011                                                                                                                                                                                                                                                               |
| 33 | Drury O'Neill, E., Crona, B., Ferrer, A.J.G., Pomeroy, R., & Jiddawi, N.S. (2018). Who benefits from seafood trade? A comparison of social and market structures in small-scale fisheries. <i>Ecology and Society</i> , 23. DOI:10.5751/es-10331-230312                                                                                                                                                                                                                                                                   |
| 34 | Rivera, V.S., Cordero, P.M., Rojas, D.C. <i>et al.</i> (2017). Institutions and collective action in a Costa Rican small-scale fishery cooperative: the case of CoopeTárcoles R.L. <i>Maritime Studies</i> , 16, 22. DOI: 10.1186/s40152-017-0077-1                                                                                                                                                                                                                                                                       |
| 35 | Fadigas, A.B. (2017). Vulnerability factors of shellfisherwomen in the face of oil spill events: An analysis of the Prestige case. <i>International journal of disaster risk reduction</i> , 24, 560-567. DOI: 10.1016/j.ijdr.2017.07.010                                                                                                                                                                                                                                                                                 |
| 36 | Locke, C., Muljono, P., Mcdougall, C., & Morgan, M. (2017). Innovation and gendered negotiations: Insights from six small-scale fishing communities. <i>Fish and Fisheries</i> , 18, 943–957. DOI: 10.1111/faf.12216                                                                                                                                                                                                                                                                                                      |
| 37 | Uc-Espadas, M., Molina-Rosales, D., Vázquez-García, V., Pérez-Jiménez, J. C., & Gurri-García, F. (2017). Fishing permits and gender relations in Isla Arena, Campeche. <i>Agricultura, sociedad y desarrollo</i> , 14(3), 383-404. Recuperado en 15 de septiembre de 2022, de <a href="http://www.scielo.org.mx/scielo.php?script=sci_arttext&amp;pid=S1870-54722017000300383&amp;lng=es&amp;tlng=en">http://www.scielo.org.mx/scielo.php?script=sci_arttext&amp;pid=S1870-54722017000300383&amp;lng=es&amp;tlng=en</a> . |
| 38 | Drury O'Neill, D, D.E., & Crona, B. (2017). Assistance networks in seafood trade – A means to assess benefit distribution in small-scale fisheries. <i>Marine Policy</i> , 78, 196-205. DOI: 10.1016/j.marpol.2017.01.025.                                                                                                                                                                                                                                                                                                |
| 39 | Purdy, D.H., Hadley, D.J., J Kenter, J.O, & Kinch, J.(2017). Sea Cucumber Moratorium and Livelihood Diversity in Papua New Guinea. <i>Coastal Management</i> , 45,2, 161-177. DOI: 10.1080/08920753.2017.1278147                                                                                                                                                                                                                                                                                                          |
| 40 | McClanahan, T.R., & Abunge, C. (2017). Fish trader's gender and niches in a declining coral reef fishery: implications for sustainability. <i>Ecosystem Health and Sustainability</i> , 3,6. DOI: 10.1080/20964129.2017.1353288                                                                                                                                                                                                                                                                                           |
| 41 | Paul, S.A.L., Wilson, A.M.W., Cachimo, R., & Riddell, M.A. (2016). Piloting participatory smartphone mapping of intertidal fishing grounds and resources in northern Mozambique: Opportunities and future directions. <i>Ocean &amp; Coastal Management</i> , 134, 79–92. DOI: 10.1016/j.ocecoaman.2016.09.018                                                                                                                                                                                                            |
| 42 | Purcell, S.W., Ngaluafe, P., Aram, K.T., & Lalavanua, W. (2016). Trends in small-scale artisanal fishing of sea cucumbers in Oceania. <i>Fisheries Research</i> , 183, 99-110. DOI: 10.1016/j.fishres.2016.05.010                                                                                                                                                                                                                                                                                                         |
| 43 | Andrade, L.P., Silva-Andrade, H.M.L., Lyra-Neves, R.M. <i>et al.</i> (2016). Do artisanal fishers perceive declining migratory shorebird populations? <i>Journal of Ethnobiology and Ethnomedicine</i> , 12, 16. DOI: 10.1186/s13002-016-0087-x                                                                                                                                                                                                                                                                           |
| 44 | Gianelli, I., Martínez, G., & Defeo, O. (2015). An ecosystem approach to small-scale co-managed fisheries: The yellow clam fishery in Uruguay. <i>Marine Policy</i> , 62, 196-202. DOI: 10.1016/j.marpol.2015.09.025.                                                                                                                                                                                                                                                                                                     |
| 45 | Santos, A., N. (2015). Fisheries as a way of life: Gendered livelihoods, identities and perspectives of artisanal fisheries in eastern Brazil. <i>Marine Policy</i> , Elsevier, 62(C), 279-288. DOI: 10.1016/j.marpol.2015.09.007                                                                                                                                                                                                                                                                                         |
| 46 | Nunan, F., Hara, M., Onyango, P. (2015). Institutions and Co-Management in East African Inland and Malawi Fisheries: A Critical Perspective. <i>World Development</i> , 70, 203–214. DOI: 10.1016/j.worlddev.2015.01.009                                                                                                                                                                                                                                                                                                  |
| 47 | Zacarkim, C.E., Piana, P.A., Baumgartner, G. <i>et al.</i> (2015). The panorama of artisanal fisheries of the Araguaia River, Brazil. <i>Fisheries Science</i> , 81, 409–416. DOI: 10.1007/s12562-015-0853-z                                                                                                                                                                                                                                                                                                              |

|    |                                                                                                                                                                                                                                                                                                                          |
|----|--------------------------------------------------------------------------------------------------------------------------------------------------------------------------------------------------------------------------------------------------------------------------------------------------------------------------|
| 48 | Ramírez, A., Ortiz, M., Steenbeek, J., & Christensen, V. (2015). Evaluation of the effects on rockfish and kelp artisanal fisheries of the proposed Mejillones Peninsula marine protected area (northern Chile, SE Pacific coast). <i>Ecological Modelling</i> , 297, 141–153. DOI: 10.1016/j.ecolmodel.2014.11.012      |
| 49 | Thorpe, A., Pouw, N., Baio, A., Sandi, R., Ndomahina, E.T., & Lebbie, T. (2014). “Fishing Na Everybody Business”: Women's Work and Gender Relations in Sierra Leone's Fisheries. <i>Feminist Economics</i> , 20, 53–77. DOI:10.1080/13545701.2014.895403                                                                 |
| 50 | Kleiber, D., Harris, L. M., & Vincent, A.C.J. (2013). Improving fisheries estimates by including women's catch in the Central Philippines. <i>Canadian Journal of Fisheries and Aquatic Sciences</i> , 71, 5, 656-664. DOI: 10.1139/cjfas-2013-0177                                                                      |
| 51 | Matsue, N., Daw, T., Garrett, L. (2014). Women Fish Traders on the Kenyan Coast: Livelihoods, Bargaining Power, and Participation in Management. <i>Coastal Management</i> , 42, 531–554. DOI: 10.1080/08920753.2014.964819                                                                                              |
| 52 | Fröcklin, S., De La Torre-Castro, M., Lindström, L., & Jiddawi, N.S. (2013). Fish Traders as Key Actors in Fisheries: Gender and Adaptive Management. <i>Ambio</i> , 42, 951–962. DOI :10.1007/s13280-013-0451-1                                                                                                         |
| 53 | Harper, S., Zeller, D., Hauzer, M., Pauly, D., & Sumaila, U.R. (2013). Women and fisheries: Contribution to food security and local economies. <i>Marine Policy</i> , 39, 56–63. DOI: 10.1016/j.marpol.2012.10.018                                                                                                       |
| 54 | Hauzer, M., Dearden, P., & Murray, G. (2013). The fisherwomen of Ngazidja island, Comoros: Fisheries livelihoods, impacts, and implications for management. <i>Fisheries Research</i> , 140, 28–35. DOI: 10.1016/j.fishres.2012.12.001                                                                                   |
| 55 | Neis, B., Gerrard, S., & Power, N.G. (2013). Women and Children First: the Gendered and Generational Social-ecology of Smaller-scale Fisheries in Newfoundland and Labrador and Northern Norway. <i>Ecology and Society</i> , 18. DOI: 10.5751/es-06010-180464                                                           |
| 56 | Ngwenya, B.N., Mosepele, K.K., & Magole, L. (2012). A case for gender equity in governance of the Okavango Delta fisheries in Botswana. <i>Natural Resources Forum</i> , 36, 109–122. DOI:10.1111/j.1477-8947.2012.001450.x                                                                                              |
| 57 | Crawford, B., Herrera, M.D., Hernandez, N., Leclair, C.R., Jiddawi, N., Masumbuko, S., Haws, M. (2010). Small Scale Fisheries Management: Lessons from Cackle Harvesters in Nicaragua and Tanzania. <i>Coastal Management</i> , 38, 195–215. DOI : 10.1080/08920753.2010.483174                                          |
| 58 | Arce-Ibarra, A.M., Charles, A.T. (2008). Inland fisheries of the Mayan Zone in Quintana Roo, Mexico: Using a combined approach to fishery assessment for data-sparse fisheries. <i>Fisheries Research</i> , 91, 151–159. DOI: 10.1016/j.fishres.2007.11.015                                                              |
| 59 | Arif, M., Subramaniam, T., & Raduan, M.S. (2008). Bajau women as key workforce in artisanal fishermen family in mengkabong village, tuaran, sabah.                                                                                                                                                                       |
| 60 | Di Ciommo, R. C. (2007). Gender, Tourism, and Participatory Appraisals at the Corumbau Marine Extractive Reserve, Brazil. <i>Human Ecology Review</i> , 14, 1, 56–67. <a href="http://www.jstor.org/stable/24707643">http://www.jstor.org/stable/24707643</a>                                                            |
| 61 | Kuster, C., Vuki, V.C., & Zann, L.P. (2005). Long-term trends in subsistence fishing patterns and coral reef fisheries yield from a remote Fijian island. <i>Fisheries Research</i> , 76, 221–228. DOI: 10.1016/j.fishres.2005.06.011                                                                                    |
| 62 | Ashworth, J.S., Ormond, R.F.G., & Sturrock, H.T. (2004). Effects of reef-top gathering and fishing on invertebrate abundance across take and no-take zones. <i>Journal of Experimental Marine Biology and Ecology</i> , 303, 221–242. DOI: 10.1016/j.jembe.2003.11.017                                                   |
| 63 | Branch, G.M., May, J., Roberts, B., Russell, E., & Clark, B.M. (2002). Case studies on the socio-economic characteristics and lifestyles of subsistence and informal fishers in South Africa. <i>South African Journal of Marine Science</i> , 24, 439–462. DOI: 10.2989/025776102784528457                              |
| 64 | King, M. & Faasili U. (1999). Community-based management of subsistence fisheries in Samoa: Fisheries Management and Ecology, 6, 2, 133-144. DOI: doi.org/10.1046/j.1365-2400.1999.00136.x                                                                                                                               |
| 65 | Uduji, J.I., & Okolo-Obasi, E.N. (2020). Does corporate social responsibility (CSR) impact on development of women in small-scale fisheries of sub-Saharan Africa? Evidence from coastal communities of Niger Delta in Nigeria. <i>Marine Policy</i> , 118. DOI:10.1016/j.marpol.2018.10.036                             |
| 66 | María Esther, C.-C., Miguel Ángel, C.-M., Gabriela, M.-M., Ileana, E., Andrés Miguel, C.-M., Luis, M.-C. (2021). Analysis of the Gulf of California cannonball jellyfish fishery as a complex system. <i>Ocean &amp; Coastal Management</i> 207, 105610. DOI: 10.1016/j.ocecoaman.2021.105610                            |
| 67 | Barrero-Amórtegui, Y., & Maldonado, J.H. (2021). Gender composition of management groups in a conservation agreement framework: Experimental evidence for mangrove use in the Colombian Pacific. <i>World Development</i> 142, 105449. DOI: 10.1016/j.worlddev.2021.105449                                               |
| 68 | Thomas, A., Mangubhai, S., Fox, M., Meo, S., Miller, K., Naisilisili, W., Veitayaki, J., & Waqairatu, S. (2021). Why they must be counted: Significant contributions of Fijian women fishers to food security and livelihoods. <i>Ocean &amp; Coastal Management</i> , 205, 105571. DOI: 10.1016/j.ocecoaman.2021.105571 |
| 69 | Kaminski, A.M., Cole, S.M., Al Haddad, R.E., Kefi, A.S., Chilala, A.D., Chisule, G., Mukuka, K.N., Longley, C., Teoh, S.J., Ward, A.R. (2020). Fish Losses for Whom? A Gendered Assessment of Post-Harvest Losses in the Barotse Floodplain Fishery, Zambia. <i>Sustainability</i> , 12, 10091. DOI: 10.3390/su122310091 |

|    |                                                                                                                                                                                                                                                                                                                                                                             |
|----|-----------------------------------------------------------------------------------------------------------------------------------------------------------------------------------------------------------------------------------------------------------------------------------------------------------------------------------------------------------------------------|
| 70 | Nessa, N., Gatta, R., Ambo-Rappe, R., Jompa, J., & Yahya, A. (2020). The role of women in the utilization of <i>Enhalus acoroides</i> : livelihoods, food security, impacts and implications for coastal area management. IOP Conference Series: <i>Earth and Environmental Science</i> , 564. DOI: 10.1088/1755-1315/564/1/012073                                          |
| 71 | Cezar, L. S., & Theis, R. (2020). Ser ou não ser pescadora artesanal? Trabalho feminino, reconhecimento e representação social entre marisqueiras da Baía de Campos, RJ. <i>Revista de Antropologia</i> , 63, 3, 1–20. <a href="https://www.jstor.org/stable/27008100">https://www.jstor.org/stable/27008100</a>                                                            |
| 72 | Torell, E., Bilecki, D., Owusu, A., Crawford, B., Beran, K., & Kent, K. (2019). Assessing the Impacts of Gender Integration in Ghana's Fisheries Sector. <i>Coastal Management</i> , 47, 507–526. DOI :10.1080/08920753.2019.1669098                                                                                                                                        |
| 73 | MacKeracher, T., Foale, S. J., Gurney, G. G., & Purcell, S. W. (2019). Adoption and diffusion of technical capacity-building innovations by small-scale artisanal fishers in Fiji. <i>Ecology and Society</i> , 24, 2. <a href="https://www.jstor.org/stable/26796932">https://www.jstor.org/stable/26796932</a>                                                            |
| 74 | Musinguzi, L., Natugonza, V., Efitre, J., & Ogutu-Ohwayo R. (2018) The role of gender in improving adaptation to climate change among small-scale fishers. <i>Climate and Development</i> , 10, 6, 566-576. DOI: 10.1080/17565529.2017.1372262                                                                                                                              |
| 75 | Hoque Mozumder, M.M., Shamsuzzaman, M.M., Rashed-Un-Nabi, M., Karim, E. (2018). Social-ecological dynamics of the small- scale fisheries in Sundarban Mangrove Forest, Bangladesh. <i>Aquaculture and Fisheries</i> , 3, 38–49. DOI :10.1016/j.aaf.2017.12.002                                                                                                              |
| 76 | Mul, M., Pettinotti, L., Amonoo, N. A., Bekoe-Obeng, E., & Obuobie, E. (2017). Dependence of riparian communities on ecosystem services in northern Ghana. Colombo, Sri Lanka: International Water Management Institute (IWMI). 43p. (IWMI Working Paper 179). DOI: 10.5337/2018.201                                                                                        |
| 77 | Lowe, M.E. (2015). Localized practices and globalized futures: challenges for Alaska coastal community youth. <i>Maritime Studies</i> , 14. DOI:10.1186/s40152-015-0024-y                                                                                                                                                                                                   |
| 78 | Eder, J.F. (2012). The role of gender in the reduction of fishing effort in the coastal Philippines. <i>Gender and Sustainability: Lessons from Asia and Latin America</i> . 187-206.                                                                                                                                                                                       |
| 79 | Gurung, T.B. (2007). Restoration of small lakes through cooperative management: A suitable strategy for poverty-laden areas in developing countries? <i>Lakes &amp; Reservoirs: Science, Policy and Management for Sustainable Use</i> , 12, 237–246. DOI: 10.1111/j.1440-1770.2007.00341.x                                                                                 |
| 80 | Di Ciommo, R. (2007). Fishermen and fisherwomen: gender equity in a marine extractive reserve. <i>Ambiente &amp; Sociedade</i> , 10, 1, 151-163. DOI: 10.1590/S1414-753X2007000100010                                                                                                                                                                                       |
| 81 | Ferguson, C.E. (2021) A Rising Tide Does Not Lift All Boats: Intersectional Analysis Reveals Inequitable Impacts of the Seafood Trade in Fishing Communities. <i>Frontiers in Marine Science</i> , 8,625389. DOI: 10.3389/fmars.2021.625389                                                                                                                                 |
| 82 | Purcell, S. W., Tagliafico, A., Cullis, B. R., & Gogel, B.J., (2021). Socioeconomic impacts of resource diversification from small-scale fishery development. <i>Ecology and Society</i> , 26,1,14. DOI: 10.5751/ES-12183-260114                                                                                                                                            |
| 83 | Zeller, D., Vianna, G.M.S., Ansell, M., Coulter, A., Derrick, B., Greer, K., Noël, S-L., Palomares, M.L.D., Zhu, A., & Pauly, D. (2021). Fishing Effort and Associated Catch per Unit Effort for Small-Scale Fisheries in the Mozambique Channel Region: 1950–2016. <i>Frontiers in Marine Science</i> , 8, 707999. DOI: 10.3389/fmars.2021.707999                          |
| 84 | Gustavsson, M., Frangoudes, K., Lindström, L., Álvarez Burgos, M.C., & de la Torre-Castro, M. (2021). Gender and Blue Justice in small-scale fisheries governance. <i>Marine Policy</i> , 133, 104743. DOI:10.1016/j.marpol.2021.104743                                                                                                                                     |
| 85 | Pedroza-Gutiérrez, C., & Hapke, H.M. (2021). Women's work in small-scale fisheries: a framework for accounting its value. <i>Gender, Place &amp; Culture</i> , 1–18. DOI :10.1080/0966369x.2021.1997936                                                                                                                                                                     |
| 86 | Aburto, J.A., Stotz, W., Cundill, G., Tapia, C. (2021). Toward understanding the long-term persistence of a local governance system among artisanal fishers in Chile. <i>Ecology and Society</i> , 26. DOI:10.5751/es-12479-260305                                                                                                                                          |
| 87 | Bernos T.A., Travouck C., Ramasinoro N., Fraser D.J., & Mathevon B. (2021) What can be learned from fishers' perceptions for fishery management planning? Case study insights from Sainte-Marie, Madagascar. <i>PLoS ONE</i> , DOI: 10.1371/journal.pone.0259792.                                                                                                           |
| 88 | Jeeva, J. C. & Gopal, N. (2021). A Participatory Assessment of Entrepreneurial Skills among Women in Small-Scale Fisheries. <i>FISH Technologies</i> . 58,3, 171-176. DOI: 10.3389/fmars.2020.6179                                                                                                                                                                          |
| 89 | Torell, E., Manyungwa-Pasani, C., Bilecki, D., Gumulira, I., Yiwombe, G. (2021). Assessing and Advancing Gender Equity in Lake Malawi's Small-Scale Fisheries Sector. <i>Sustainability</i> ; 13,23,13001. DOI: 10.3390/su132313001                                                                                                                                         |
| 90 | Franco-Meléndez, M., Tam, J., van Putten, I., Cubillos, L.A. (2021). Integrating human and ecological dimensions: The importance of stakeholders' perceptions and participation on the performance of fisheries co-management in Chile. <i>PLOS ONE</i> , 16,8, e0254727. DOI: 10.1371/journal.pone.0254727                                                                 |
| 91 | Thomas, A., Mangubhai, S., Fox, M., Meo, S., Miller, K., Naisilisi, W., Veitayaki, J., & Waqairatu, S. (2021). Why they must be counted: Significant contributions of Fijian women fishers to food security and livelihoods. <i>Ocean &amp; Coastal Management</i> , 205, 105571. DOI: 10.1016/j.ocecoaman.2021.105571                                                      |
| 92 | Da Silva Mourão, J., Baracho, R.L., De Faria Lopes, S., Medeiros, M.C., & Diele, K. (2021). The harvesting process and fisheries production of the venus clam <i>Anomalocardia flexuosa</i> in a Brazilian extractive reserve, with implications for gender-sensitive management. <i>Ocean &amp; Coastal Management</i> , 213, 105878. DOI: 10.1016/j.ocecoaman.2021.105878 |

|            |                                                                                                                                                                                                                                                                                                                                                |
|------------|------------------------------------------------------------------------------------------------------------------------------------------------------------------------------------------------------------------------------------------------------------------------------------------------------------------------------------------------|
| <b>93</b>  | Lau, J.D., Sutcliffe, S.R., Barnes, M.L., Mbaru, E.K., Muly, I., Muthiga, N.A., Wanyonyi, S., & Cinner, J.E. (2021). COVID-19 impacts on coastal communities in Kenya. <i>Marine Policy</i> , 134, 104803 - 104803. DOI: 10.1016/j.marpol.2021.104803                                                                                          |
| <b>94</b>  | Swathi Lekshmi, P.S., Kalidoss Radhakrishnan, R., Narayanakumar, V., Vipinkumar, P., Shinoj Parappurathu, Shyam, S., Salim, Johnson, B., & Phalguni, P. (2022). Gender and small-scale fisheries: Contribution to livelihood and local economies. <i>Marine Policy</i> , 136, 104913. DOI: 10.1016/j.marpol.2021.104913.                       |
| <b>95</b>  | Silva, M.R.O., Silva, A.B., Barbosa, J.B., Cássia Amaral, P., & Lopes, F.M. (2022). Empowering fisherwomen leaders helped reduce the effects of the COVID-19 pandemic on fishing communities: Insights from Brazil. <i>Marine Policy</i> , 135, 104842, ISSN 0308-597X. DOI: 10.1016/j.marpol.2021.104842.                                     |
| <b>96</b>  | Yadav, S., Fisam, A., Dacks, R., Madin, J. S., & Mawyer, A. (2021). Shifting fish consumption preferences can impact coral reef resilience in the Maldives: a case study. <i>Marine Policy</i> , 134, 104773. DOI: 10.1016/j.marpol.2021.104773                                                                                                |
| <b>97</b>  | Rice WS (2022). Exploring common dialectical tensions constraining collaborative communication required for post-2020 conservation. <i>Journal of Environmental Management</i> , 316, 115187. DOI: 10.1016/j.jenvman.2022.115187. Epub 2022 May 11. PMID: 35561492.                                                                            |
| <b>98</b>  | Chitará-Nhandimo, S., Chissico, A., Mubai, M.E., Cabral, A.D.S., Guissamulo, A., & Bandeira, S. (2022). Seagrass Invertebrate Fisheries, Their Value Chains and the Role of LMMAs in Sustainability of the Coastal Communities—Case of Southern Mozambique. <i>Diversity</i> 14, 170. DOI :10.3390/d14030170                                   |
| <b>99</b>  | Berenji, S., Nayak, P.K., & Shukla, A. (2021). Exploring Values and Beliefs in a Complex Coastal Social-Ecological System: A Case of Small-Scale Fishery and Dried Fish Production in Sagar Island, Indian Sundarbans. <i>Frontiers in Marine Science</i> , 8, 795973. DOI: 10.3389/fmars.2021.795973                                          |
| <b>100</b> | Sreya, P.S., Parayil, C., Aswathy, N., Bonny, B.P., Aiswarya, T.P., & Nameer, P.O. (2021). Economic vulnerability of small-scale coastal households to extreme weather events in Southern India. <i>Marine Policy</i> , 131, 104608. DOI: 10.1016/j.marpol.2021.104608                                                                         |
| <b>101</b> | López-Ercilla, I., Espinosa-Romero, M.J., Rivera-Melo, F.F., Fulton, S., Fernández, R., Torre, J., Acevedo-Rosas, A., Hernández-Velasco, A., & Amador, I. (2021). The voice of Mexican small-scale fishers in times of COVID-19: impacts, responses, and digital divide. <i>Marine Policy</i> , 131, 104606. DOI: 10.1016/j.marpol.2021.104606 |
| <b>102</b> | Oloko, A., Fakoya, K., Ferse, S., Breckwoldt, A., & Harper, S. (2022) The Challenges and Prospects of Women Fisherfolk in Makoko, Lagos State, Nigeria. <i>Coastal Management</i> , 50, 2, 124-141. DOI: 10.1080/08920753.2022.2022969                                                                                                         |
| <b>103</b> | Casagrande, A., & Rover, O.J. (2021). Institucionalização de pescarias artesanais e diálogo equitativo: o caso do molusco berbigão ( <i>Anomalocardia brasiliana</i> ) na Reserva Extrativista Marinha do Pirajubaé. <i>Desenvolvimento e Meio Ambiente</i> , 58. DOI : 10.5380/dma.v58i0.75245                                                |

**Online Resource 2- Tab.S2** Justification for document's exclusion from the second screening process (n=24)

| Reference                                                                                                                                                                                                                                                                                                                                                                                                                                                                                                         | Reason for exclusion                                  |
|-------------------------------------------------------------------------------------------------------------------------------------------------------------------------------------------------------------------------------------------------------------------------------------------------------------------------------------------------------------------------------------------------------------------------------------------------------------------------------------------------------------------|-------------------------------------------------------|
| Kluger, L.C., Alff, H., Alfaro-Córdova, E., & Alfaro-Shigueto, J. (2020). On the move: The role of mobility and migration as a coping strategy for resource users after abrupt environmental disturbance – the empirical example of the Coastal El Niño 2017. <i>Global Environmental Change</i> , 63, 102095. DOI : 10.1016/j.gloenvcha.2020.102095                                                                                                                                                              | Not meeting criterion <i>ii</i>                       |
| Paul, T.T., Salim, S.S., S, M., Sarkar, U.K., & Das, B.K. (2020). Understanding variations in socio-economic vulnerabilities and the strategies adopted by small scale fishing communities of tropical reservoirs. <i>Fisheries Research</i> , 226, 105523. DOI : 10.1016/j.fishres.2020.105523                                                                                                                                                                                                                   | Not meeting criterion <i>iv</i>                       |
| Bradford, K., & Katikiro, R.E. (2019). Fighting the tides: A review of gender and fisheries in Tanzania. <i>Fisheries Research</i> , 216, 79–88. DOI: 10.1016/j.fishres.2019.04.003                                                                                                                                                                                                                                                                                                                               | Not meeting criterion <i>i</i>                        |
| de la Torre-Castro, M. (2019). Inclusive Management Through Gender Consideration in Small-Scale Fisheries: The Why and the How. <i>Frontiers in Marine Science</i> , 6, 156. DOI: 10.3389/fmars.2019.00156                                                                                                                                                                                                                                                                                                        | Not meeting criterion <i>i</i>                        |
| Fulton S., Hernández, A., Suárez-Castillo, A., Fernández-Rivera Melo, F., Rojo, M., Sáenz-Arrollo, A., Hudson Weaver, A., Cudney-Bueno, R., Micheli, F., & Torre., J. (2019). From fishing fish to fishing data: the role of artisanal fishers in conservation and resource management in Mexico. En: Viability and sustainability of small-scale fisheries in Latin America and The Caribbean. S Salas, M.J. Barragán-Paladines, R. Chuenpagdee(eds.). MARE Publication Series, 19. Springer, Cham. pp. 151-175. | Not meeting criterion <i>iv</i>                       |
| Lauria, V., Das, I., Hazra, S., Cazcarro, I., Arto, I., Kay, S., Ofori-Danson, P.K., Ahmed, M., Hossain, M.A., Barangé, M., & Fernandes, J.A. (2018). Importance of fisheries for food security across three climate change vulnerable deltas. <i>The Science of the total environment</i> , 640-641, 1566-1577. DOI : 10.1016/j.scitotenv.2018.06.011                                                                                                                                                            | Not meeting criterion <i>i</i>                        |
| Hurley, M., & Manel, C. (2015). Coordination, Development and Governance of Senegal Small-Scale Fisheries.                                                                                                                                                                                                                                                                                                                                                                                                        | Not meeting criterion <i>iv</i>                       |
| Sharma, C.M. (2008) Freshwater Fishes, Fisheries and Habitat Prospects of Nepal. <i>Aquatic Ecosystem, Health and Management</i> , 11, 75-82. DOI: 10.1080/14634980802317329                                                                                                                                                                                                                                                                                                                                      | Not meeting criterion <i>iv</i>                       |
| Stacey, N., Gibson, E., Loneragan, N.R., Warren, C., Wiryawan, B., Adhuri, D., & Fitriana, R. (2019). Enhancing coastal livelihoods in Indonesia: an evaluation of recent initiatives on gender, women and sustainable livelihoods in small-scale fisheries. <i>Maritime Studies</i> , 18, 359–371. DOI:10.1007/s40152-019-00142-5                                                                                                                                                                                | Not meeting criterion <i>i</i>                        |
| Furtado, L.G., Leitão, W.M., & Mello, A.F. (1993). <i>Povos das águas : realidade e perspectivas na Amazônia</i> .                                                                                                                                                                                                                                                                                                                                                                                                | Not meeting criterion <i>i</i>                        |
| Purcell, S.W., Fraser, N.J., Tagica, S., Lalavanua, W., & Ceccarelli, D.M. (2018) Discriminating Catch Composition and Fishing Modes in an Artisanal Multispecies Fishery. <i>Frontiers in Marine Science</i> , 5, 243. DOI : 10.3389/fmars.2018.00243                                                                                                                                                                                                                                                            | Redundancy of data: based on the same data than ID 30 |
| Purcell, S.W., Ngaluafe, P., Foale, S.J., Cocks, N., Cullis, B.R., Lalavanua, W. (2016) Multiple Factors Affect Socioeconomics and Wellbeing of Artisanal Sea Cucumber Fishers. <i>PLoS ONE</i> 11, 12, e0165633. DOI: 10.1371/journal.pone.0165633                                                                                                                                                                                                                                                               | Redundancy of data: based on the same data than ID 42 |
| Amadu, I., Armah, F.A., & Aheto, D.W. (2021). Assessing Livelihood Resilience of Artisanal Fisherfolk to the Decline in Small-Scale Fisheries in Ghana. <i>Sustainability</i> , 13, 10404. DOI:10.3390/su131810404                                                                                                                                                                                                                                                                                                | Not meeting criteria <i>iii</i> and <i>iv</i>         |
| Amadu, I., Armah, F.A., Aheto, D.W., Adongo, A.C. (2021). A study on livelihood resilience in the small-scale fisheries of Ghana using a structural equation modelling approach. <i>Ocean &amp; Coastal Management</i> , 215, 105952, ISSN 0964-5691. DOI: 10.1016/j.ocecoaman.2021.105952.                                                                                                                                                                                                                       | Not meeting criterion <i>iv</i>                       |
| Engen, S., Hausner, V.H., Gurney, G.G., Broderstad, E.G., Keller, R., Lundberg, A.K., Murguzur, F.J.A., Salminen, E., Raymond, C.M., Falk-Andersson, J., & Fauchald, P. (2021). Blue justice: A survey for eliciting perceptions of environmental justice among coastal planners' and small-scale fishers in Northern-Norway. <i>PLOS ONE</i> , 16, e0251467. DOI: 10.1371/journal.pone.0251467                                                                                                                   | Not meeting criterion <i>iv</i>                       |
| Stacey, N., Gibson, E., Loneragan, N.R., Warren, C., Wiryawan, B., Adhuri, D.S., Steenbergen, D.J., & Fitriana, R. (2021). Developing sustainable small-scale fisheries livelihoods in Indonesia: Trends, enabling and constraining factors, and future opportunities. <i>Marine Policy</i> , 132, 104654. DOI: doi.org/10.1016/j.marpol.2021.104654                                                                                                                                                              | Not meeting criterion <i>i</i>                        |
| Lawless, S., Cohen, P. J., McDougall, C., Mangubhai, S., Song, A. M. and Morrison, T. H. (2022). Tinker, tailor or transform: Gender equality amidst social-ecological change. <i>Global Environmental Change</i> , 72. 102434, ISSN 0959-3780. DOI: 10.1016/j.gloenvcha.2021.102434.                                                                                                                                                                                                                             | Redundancy of data: based on the same                 |

|                                                                                                                                                                                                                                                                                                                                                                                           |                                  |
|-------------------------------------------------------------------------------------------------------------------------------------------------------------------------------------------------------------------------------------------------------------------------------------------------------------------------------------------------------------------------------------------|----------------------------------|
|                                                                                                                                                                                                                                                                                                                                                                                           | data than ID 5                   |
| Mangubhai, S., Nand, Y., Reddy, C., Jagadish, A. (2021). Politics of vulnerability: Impacts of COVID-19 and Cyclone Harold on Indo-Fijians engaged in small-scale fisheries. <i>Environmental Science and Policy</i> , 120:195-203. DOI: 10.1016/j.envsci.2021.03.003. Epub 2021 Mar 25. PMID: 34867082; PMCID: PMC8629164.                                                               | Not meeting criterion <i>iv</i>  |
| Kimbu, A.N., Booyens, I., & Winchenbach, A. (2022). Livelihood Diversification Through Tourism: Identity, Well-being, and Potential in Rural Coastal Communities. <i>Tourism Review International</i> , 26, 25–40. DOI:10.3727/154427221x16245632411854                                                                                                                                   | Not meeting criterion <i>iii</i> |
| Smallhorn-West, P., Van Der Ploeg, J., Boso, D., Sukulu, M., Leamae, J., Isihanua, M., Jasper, M., Saeni-Oeta, J., Batalofo, M., Orirana, G., Konamalefo, A., Houma, J., & Eriksson, H. (2022). Patterns of catch and trophic signatures illustrate diverse management requirements of coastal fisheries in Solomon Islands. <i>Ambio</i> , 51, 1504–1519. DOI:10.1007/s13280-021-01690-z | Not meeting criterion <i>iv</i>  |
| Massey, L.M., McCord Camerden, P., Gaos, A.R., Liles, M.J., Seminoff, A.J., & Ahern, A.L.M (2022). Challenging gender inequity in wildlife conservation: a women’s group leading sea turtle conservation efforts in El Salvador. <i>Local Environment</i> , 27,1, 1-15. DOI: 10.1080/13549839.2021.1997962                                                                                | Not meeting criterion <i>iii</i> |
| Lee, J., & Kim, D. (2021). Analysis of the Discriminatory Perceptions of Victims on Damage from Environmental Pollution: A Case Study of the Hebei Spirit Oil Spill in South Korea. <i>Land</i> . DOI: Spill 10.3390/land10101089                                                                                                                                                         | Not meeting criterion <i>iii</i> |
| Appiah, S., Antwi-Asare, O.T., Agyire-Tettey, F.K, Abbey, E., Kuwornu, J.K.M., Cole, S. &Chimatiro, S.L. (2021). Livelihood Vulnerabilities Among Women in Small-Scale Fisheries in Ghana. <i>The European Journal of Development Research</i> , Palgrave Macmillan;European Association of Development Research and Training Institutes (EADI), 33,6,1596-1624.                          | Not meeting criterion <i>iii</i> |
| Lawless, S., Cohen, P.J., Mangubhai, S., Kleiber, D., & Morrison, T.H. (2021). Gender equality is diluted in commitments made to small-scale fisheries. <i>World Development</i> , 140, 105348. DOI:10.1016/j.worlddev.2020.105348                                                                                                                                                        | Not meeting criterion <i>i</i>   |
