# Supplementary material for: A synthesis of women’s participation in small-scale fisheries management: why women’s voices matter
Source: PubMed Central journal article supplement (PMC10838824; doi:10.1007/s11160-023-09806-2), 2023-10-18
Supplement: 11160_2023_9806_MOESM2_ESM.pdf [file 11160_2023_9806_MOESM2_ESM.pdf]

## SUPPLEMENTARY FILE 2

### **Article title: A Synthesis of Women’s Participation in Small-Scale Fisheries Management: Why Women’s Voices Matter**

**Journal name:** *Reviews in Fish Biology and Fisheries*

**Authors and Affiliations:** Mouna CHAMBON<sup>1</sup>, Sara MIÑARRO<sup>1</sup>, Santiago ALVAREZ FERNANDEZ<sup>1</sup>, Vincent PORCHER<sup>1,2</sup>, Victoria REYES-GARCIA<sup>1,3,4</sup>, Huran TONALLI DROUET<sup>5</sup>, Patrizia ZIVERI<sup>1,3,6</sup>

<sup>1</sup> Institute of Environmental Science and Technology, Universitat Autònoma de Barcelona, (ICTA-UAB), 08193, Bellaterra, Barcelona, Spain.

<sup>2</sup> Unité mixte de recherche “Savoirs Environnement Sociétés”(SENS), Institut de recherche pour le développement (IRD) & Centre de coopération internationale en recherche agronomique pour le développement (Cirad), Montpellier, France.

<sup>3</sup> Institució Catalana de Recerca i Estudis Avançats (ICREA), Barcelona 08010, Spain.

<sup>4</sup> Dept. d’Antropologia Social i Cultural, Universitat Autònoma de Barcelona, 08193, Bellaterra, Barcelona, Spain.

<sup>5</sup> Université libre de Bruxelles, Avenue Franklin Roosevelt 50, 1050, Bruxelles, Belgium.

<sup>6</sup> Dept. de Biologia Animal, Biologia Vegetal i Ecologia, Universitat Autònoma de Barcelona, 08193, Bellaterra, Barcelona, Spain.

**Corresponding author:**

Mouna CHAMBON

Institute of Environmental Science and Technology, Universitat Autònoma de Barcelona (ICTA-UAB), 08193, Bellaterra, Barcelona, Spain

ORCID: 0000-0002-2260-5145; Tel : (+34) 6.67.58.05.87; E-mail : [Mouna.Chambon@uab.cat](mailto:Mouna.Chambon@uab.cat)

**Online Resource 3- Tab. S3** Definition of variables used in the systematic literature review

| <i>Variable</i>                                                  | <i>Definition</i>                                                                    | <i>Format</i>                                                                                                                                                                                                                                                                                                                                                                                                                                                                                                                                                                                                                                                                                                                                                                                                                                                                                                                                          |
|------------------------------------------------------------------|--------------------------------------------------------------------------------------|--------------------------------------------------------------------------------------------------------------------------------------------------------------------------------------------------------------------------------------------------------------------------------------------------------------------------------------------------------------------------------------------------------------------------------------------------------------------------------------------------------------------------------------------------------------------------------------------------------------------------------------------------------------------------------------------------------------------------------------------------------------------------------------------------------------------------------------------------------------------------------------------------------------------------------------------------------|
| <b><i>Women's participation in SSF management</i></b>            |                                                                                      |                                                                                                                                                                                                                                                                                                                                                                                                                                                                                                                                                                                                                                                                                                                                                                                                                                                                                                                                                        |
| <i>Women's participation level in SSF management</i>             | Women's participation level in SSF management processes                              | 0= Excluded from management processes<br>1= Participation to some management activities but facing limitations to participate in decision-making processes<br>2= Active participation in management decision-making processes                                                                                                                                                                                                                                                                                                                                                                                                                                                                                                                                                                                                                                                                                                                          |
| <b><i>Socio-cultural, environmental and economic impacts</i></b> |                                                                                      |                                                                                                                                                                                                                                                                                                                                                                                                                                                                                                                                                                                                                                                                                                                                                                                                                                                                                                                                                        |
| <i>Impact Participation</i>                                      | The reported impact is related to the participation of women in management processes | 0= No<br>1= Yes                                                                                                                                                                                                                                                                                                                                                                                                                                                                                                                                                                                                                                                                                                                                                                                                                                                                                                                                        |
| <i>Impact direction</i>                                          | The reported impact is presented as positive in the publication                      | 0= No<br>1= Yes                                                                                                                                                                                                                                                                                                                                                                                                                                                                                                                                                                                                                                                                                                                                                                                                                                                                                                                                        |
| <i>Impact scale</i>                                              | Scale of the reported impact in the publication (select one only)                    | 1= Socio-ecological system (SES) scale<br>2= Community scale<br>3= Individual scale                                                                                                                                                                                                                                                                                                                                                                                                                                                                                                                                                                                                                                                                                                                                                                                                                                                                    |
| <i>Impact category</i>                                           | Category of the reported impact in the publication (select one only)                 | 1= Socio-cultural impact<br>2= Environmental impact<br>3= Economic impact                                                                                                                                                                                                                                                                                                                                                                                                                                                                                                                                                                                                                                                                                                                                                                                                                                                                              |
| <i>Impact subcategory</i>                                        | Subcategory of the reported impact in the publication (select one only)              | 1 = Change in the understanding of the gender dynamics within the SSF SES (Comprehensiveness)<br>2 = Change in the impact of management decisions on women (Gendered management impact)<br>3 = Change in the recognition of gendered ecological knowledge (Gendered ecological knowledge)<br>4 = Change in the compliance to management measures (Compliance)<br>5 = Change in the diversity of perspectives for SSF management (Diverse perspectives)<br>6 = Change in the long-term use of fisheries resources (Sustainable management)<br>7 = Change in human pressure on local ecosystems (Ecological pressure)<br>8 = Change in food security (Food security)<br>9 = Change in adaptive capacity (Adaptive capacity)<br>10 = Change in the social attributes of the community (Community social attributes)<br>11 = Change in the transmission of traditional knowledge (Cultural heritage)<br>12 = Change in community income (Community income) |

|  |  |                                                                                                                                                                                                                                                                                                                               |
|--|--|-------------------------------------------------------------------------------------------------------------------------------------------------------------------------------------------------------------------------------------------------------------------------------------------------------------------------------|
|  |  | 13 = Change in well-being (Well-being)<br>14 = Change in capacity building (Capacity building)<br>15= Change in women's empowerment and self-esteem (Empowerment)<br>16 = Change in gender roles (Gender roles)<br>17= Change in women's leisure time (Women's leisure time)<br>18= Change in women's income (Women's income) |
|--|--|-------------------------------------------------------------------------------------------------------------------------------------------------------------------------------------------------------------------------------------------------------------------------------------------------------------------------------|

**Online Resource 4- Tab. S4** Adapted classification of the levels of women's participation in small-scale fishery management, after Agarwal's typology of women's participation in nature resource management (2001)

| Corresponding level of participation | Agarwal's category       | Characteristic features                                                                                                  |
|--------------------------------------|--------------------------|--------------------------------------------------------------------------------------------------------------------------|
| <b>Excluded</b>                      | /                        | /                                                                                                                        |
| <b>Limited</b>                       | Nominal                  | Membership in the group                                                                                                  |
|                                      | Passive                  | Being informed of decision ex post facto; or attending meetings and listening in on decision-making, without speaking up |
|                                      | Consultative             | Being asked an opinion in specific matters without decisions                                                             |
|                                      | Activity-specific        | Being asked to (or volunteering to) undertake specific tasks                                                             |
| <b>Active</b>                        | Active                   | Expressing opinion, whether or not solicited or taking initiatives of other sorts                                        |
|                                      | Interactive (empowering) | Having voice and influence in the group's decisions                                                                      |
